# Supplementary material for: ESBL Detection: Comparison of a Commercially Available Chromogenic Test for Third Generation Cephalosporine Resistance and Automated Susceptibility Testing in Enterobactericeae
Source: PubMed Central journal article supplement (PMC4975492; doi:10.1371/journal.pone.0160203), 2016-08-05
Supplement: pone.0160203.s001.pdf [file pone.0160203.s001.pdf]

Supporting information S1 Fig.

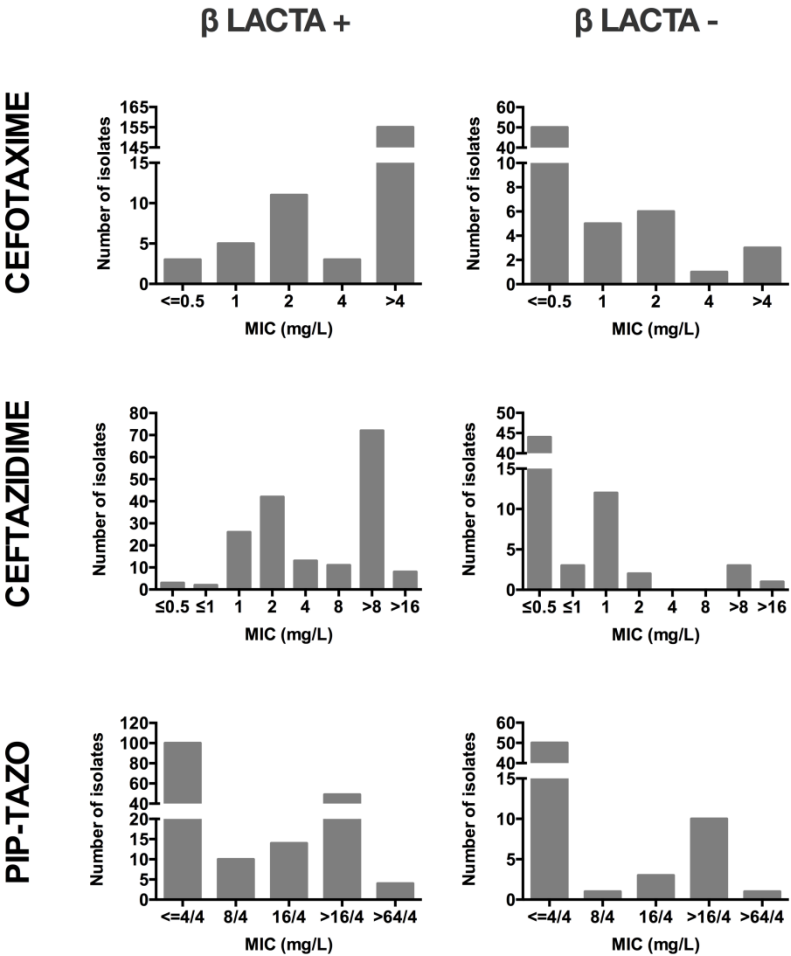

S1 Fig. Correlation of  $\beta$ LACTA<sup>TM</sup> with automated susceptibility testing using Phoenix<sup>TM</sup>. The graph shows positive (left) and negative (right)  $\beta$ LACTA<sup>TM</sup> results and the respective distribution of MIC (number of isolates for each MIC value) of cefotaxime (upper panel), ceftazidime (middle), piperacillin/tazobactam (lower panel) susceptibility testing obtained by Phoenix<sup>TM</sup> analysis.
